# Supplementary material for: Improved performance of printed electrochemical sensors via cold atmospheric plasma surface modification
Source: Royal Society of Chemistry journal article supplement (doi:10.1039/d2tc00905f), 2022-01-01
Supplement: d2tc00905f1.pdf [file d2tc00905f1.pdf]

## Supplementary Information

# Improved Performance of Printed Electrochemical Sensors via Cold Atmospheric Plasma Surface Modification

Sotoudeh Sedaghat<sup>a, b†</sup>, Venkat Kasi<sup>a, b†</sup>, Sina Nejadi<sup>a, b</sup>, Akshay Krishnakumar<sup>b, c</sup>, Rahim Rahimi<sup>a, b\*</sup>

---

<sup>†</sup> These authors contributed equally to this work.

\* Corresponding Author  
rrahimi@purdue.edu

<sup>a</sup> School of Material Engineering, Purdue University, West Lafayette, IN, 47907, USA.

<sup>b</sup> Birck Nanotechnology Center, Purdue University, West Lafayette, IN, 47907, USA.

<sup>c</sup> School of Electrical and Computer Engineering, Purdue University, West Lafayette, IN, 47907, USA

## Water contact angle

**Table S1.** Water contact angle change for the screen-printed carbon electrodes (SPCEs) by plasma treatment using different plasma power and oxygen flow.

| Applied plasma power (W) | Applied oxygen flow rate (mL.min <sup>-1</sup> ) | Water contact angle (°) |
|--------------------------|--------------------------------------------------|-------------------------|
| <b>200</b>               | 0                                                | 84.1 ± 2.86             |
|                          | 80                                               | 23.8 ± 1.15             |
|                          | 100                                              | 21.5 ± 1.1              |
|                          | 120                                              | 17.6 ± 1.0              |
|                          | 140                                              | 13.9 ± 1.0              |
| <b>300</b>               | 0                                                | 58.3 ± 3.4              |
|                          | 80                                               | 19.1 ± 1.1              |
|                          | 100                                              | 15.8 ± 1.0              |
|                          | 120                                              | 12.8 ± 0.3              |
|                          | 140                                              | 12.4 ± 0.8              |
| <b>400</b>               | 80                                               | 18.1 ± 1.0              |
|                          | 100                                              | 15.8 ± 1.0              |
|                          | 120                                              | 14.2 ± 0.9              |
|                          | 140                                              | 12.1 ± 0.5              |
| <b>500</b>               | 80                                               | 16.4 ± 0.9              |
|                          | 100                                              | 14.0 ± 0.7              |
|                          | 120                                              | 12.3 ± 0.2              |
|                          | 140                                              | 12.1 ± 0.3              |

An increase in both plasma power and applied oxygen flow rate resulted in a decrease in WCA values. Increasing plasma power and oxygen flow rate could effectively activate SPCE surface by decontaminating the surface and adding oxygen-based functional groups, respectively.

## SEM micrographs of SPCE surface

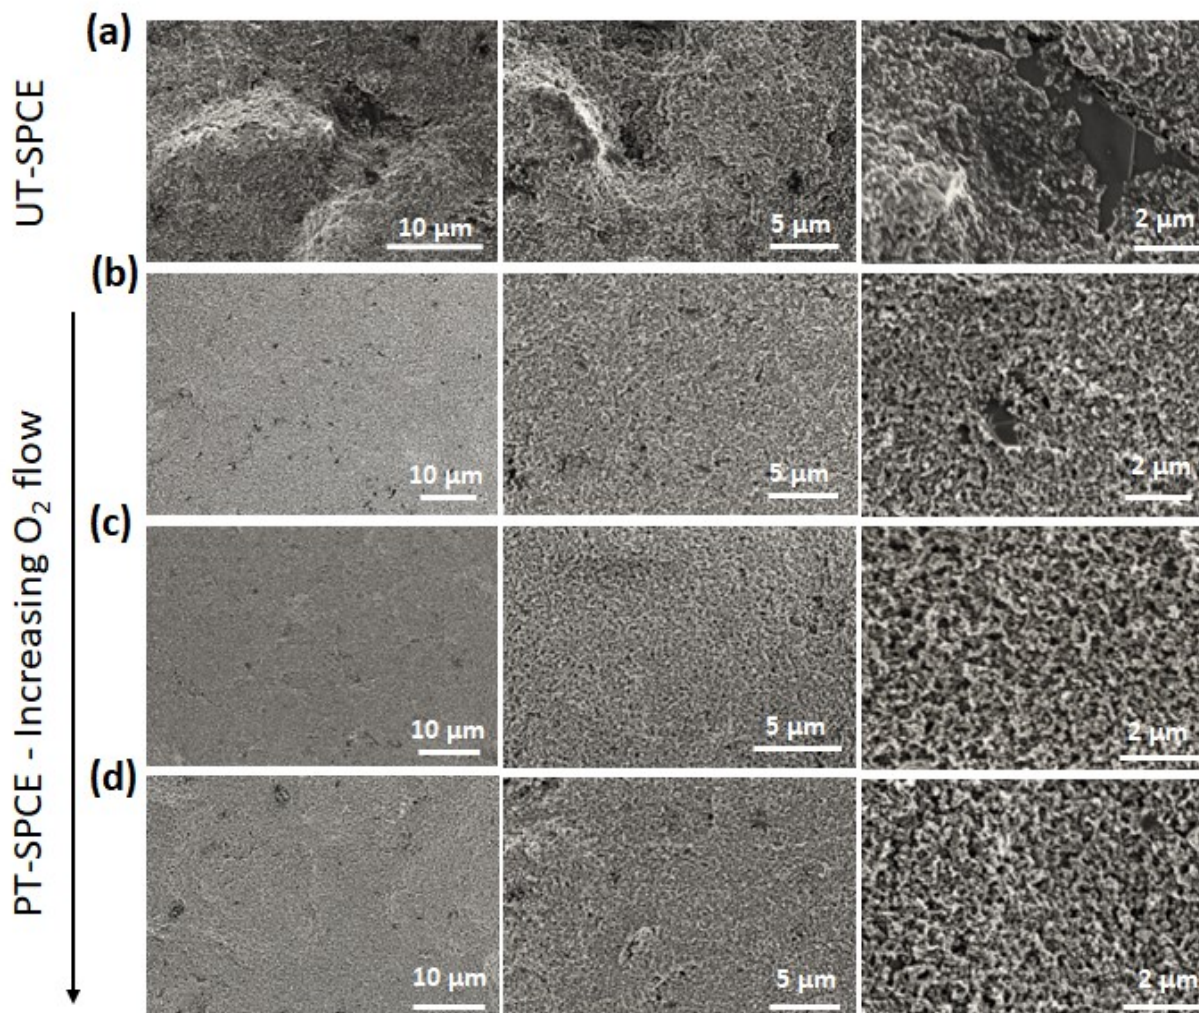

**Fig. S1.** Surface micrographs. SEM images of (a) untreated SPCE surface and Plasma-treated SPCE by applying (b) 300W- 80 mL/min O<sub>2</sub> flow, (c) 300W- 100 mL/min O<sub>2</sub> flow, (d) 300W- 120 mL/min O<sub>2</sub> flow, (e) 300W- 140 mL/min O<sub>2</sub> flow, and (f) 500W- 120 mL/min O<sub>2</sub> flow CAP treatment.

As shown in **Fig. S1(a)**, the UT- SPCE surface consists of a non-uniform morphology including fabrication residues and contaminating particles. CAP treatment improved the microstructure of the SPCE surface via removal of contamination and binder remnants from the surface and between the graphitic particles of the SPCE (**Fig.S1 (b-d)**). Increasing the oxygen flow rate enhanced the CAP effect by providing more active species. Oxygen-based components could actively connect to the superficial hydrophobic contaminations and remove them from the surface through decomposition, leaving a nano porous pristine graphitic structure on the SPCE. **Fig. S1(c)** represents the SPCE surface that resulted in the minimal WCA with the lowest plasma processing power 300W and O<sub>2</sub> flow of 120 mL.min<sup>-1</sup>.

## Selectivity coefficients

**Table S2.** Selectivity coefficients ( $\text{Log } K_{\text{NO}_3,j}$ ) of developed nitrate ISEs with and without plasma treatment at 1 mM interfering anions (j). Given mean (n=5) deviation. values are  $\pm$  standard

| Ion, j                    | $\log K_{\text{NO}_3,j}^{\text{Pot}}$ |                    |
|---------------------------|---------------------------------------|--------------------|
|                           | Untreated ISE                         | Plasma-treated ISE |
| $\text{H}_2\text{PO}_4^-$ | $-1.28 \pm 0.04$                      | $-1.45 \pm 0.02$   |
| $\text{SO}_4^{2-}$        | $-2.86 \pm 0.01$                      | $-2.89 \pm 0.01$   |
| $\text{HCO}_3^-$          | $-1.90 \pm 0.01$                      | $-1.98 \pm 0.01$   |
| $\text{Cl}^-$             | $-0.89 \pm 0.01$                      | $-1.05 \pm 0.01$   |

Anti-interference behavior of the proposed electrodes was calculated in the presence of phosphate, sulfate, bicarbonate, and chloride ions. The data are provided in **Table S2** (Supplementary Information). While the highest interference was recorded for  $\text{Cl}^-$  ion in both UT-ISE and PT-ISE, the PT-ISE showed a slightly improved selectivity. This behavior can be explained by the modified interface between SPCE and ISM which led to a consistent potential reading and minimized water-layer-formation effect.

## Comparison table

**Table S3.** Comparison of some of the reported surface modification techniques and/or materials for the development of solid-state nitrate ion-selective electrodes.

| Surface modification technique or material                           | Stability                                    | LOD (M)              | Cost   | Fabrication complexity | Scalability | Ref          |
|----------------------------------------------------------------------|----------------------------------------------|----------------------|--------|------------------------|-------------|--------------|
| Cold atmospheric plasma treatment of solid contact                   | Improved water-layer resistance, -0.1 mV/day | $1 \times 10^{-5}$   | Low    | Low                    | High        | This work    |
| Graphene implementation on solid contact                             | Improved water-layer resistance              | $3 \times 10^{-5}$   | Medium | High                   | Low         | <sup>1</sup> |
| Laser-induced graphene as solid contact                              | Improved, 5 weeks                            | $6 \times 10^{-6}$   | Low    | Medium                 | Medium      | <sup>2</sup> |
| Graphene/tetrathiafulvalene nanocomposite on solid contact           | Improved water-layer resistance, 15 mV/h     | $1 \times 10^{-6.2}$ | Medium | High                   | Low         | <sup>3</sup> |
| Nanohybrid composite films with Au nanoparticles on solid contact    | Improved water-layer resistance, 65 days     | $1 \times 10^{-5.2}$ | High   | High                   | Low         | <sup>4</sup> |
| Polyaniline nanoparticles on solid contact                           | Improved, 30 days, 0.7 mV/h                  | $2.1 \times 10^{-7}$ | Medium | High                   | Low         | <sup>5</sup> |
| Multiwall carbon nanotube on solid contact                           | Improved, 50 days                            | $1 \times 10^{-5}$   | Medium | High                   | Low         | <sup>6</sup> |
| tetrathiafulvalene-tetracyanoquinodimethane (TTF-TCNQ) solid contact | Improved potential stability                 | $1 \times 10^{-5.5}$ | Medium | High                   | Low         | <sup>7</sup> |

A comparison of our proposed surface modification technique with some of the recently reported methods for developing nitrate ISEs is provided in **Table S3** (Supplementary Information). ISE fabricated through surface modification via CAP treatment not only provided a noticeably decreased processing and manufacturing complexity, but also represented a comparable potential stability with previously reported methods. CAP can be an alternative green technique to improve the performance of various solid-contact ISEs in wearable health care or environmental monitoring applications where long-term stability of the ISE is required.

## References

1. Tang, W. *et al.* All-solid-state nitrate-selective electrode and its application in drinking water. *Electrochim. Acta* **81**, 186–190 (2012).
2. Hjort, R. G. *et al.* Hydrophobic laser-induced graphene potentiometric ion-selective electrodes for nitrate sensing. *Microchim. Acta* **189**, 1–11 (2022).
3. Pięk, M., Piech, R. & Paczosa-Bator, B. All-solid-state nitrate selective electrode with graphene/tetrathiafulvalene nanocomposite as high redox and double layer capacitance solid contact. *Electrochim. Acta* **210**, 407–414 (2016).
4. Chen, M. *et al.* An all-solid-state nitrate ion-selective electrode with nanohybrids composite films for in-situ soil nutrient monitoring. *Sensors* **20**, 2270 (2020).
5. Abd El-Rahman, M. K., Rezk, M. R., Mahmoud, A. M. & Elghobashy, M. R. Design of a stable solid-contact ion-selective electrode based on polyaniline nanoparticles as ion-to-electron transducer for application in process analytical technology as a real-time analyzer. *Sensors Actuators B Chem.* **208**, 14–21 (2015).
6. Hussein, L. A., Magdy, N. & Yamani, H. Z. Stable glycopyrrolonium bromide solid contact ion selective potentiometric sensors using multi-walled carbon nanotubes, polyaniline nanoparticles and polyaniline microparticles as ion-to-electron transducers: A comparative study. *Sensors Actuators B Chem.* **247**, 436–444 (2017).
7. Pięk, M., Piech, R. & Paczosa-Bator, B. TTF-TCNQ solid contact layer in all-solid-state ion-selective electrodes for potassium or nitrate determination. *J. Electrochem. Soc.* **165**, B60 (2018).
